# Supplementary material for: High-frequency productivity estimates for a lake from free-water CO 2 concentration measurements
Source: Copernicus journal article supplement (doi:10.5194/bg-15-2021-2018), 2018-04-09
Supplement: Supplementary file 1 [file bg-15-2021-2018-supplement.pdf]

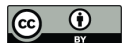

*Supplement of*

## **High-frequency productivity estimates for a lake from free-water CO<sub>2</sub> concentration measurements**

**Maria Provenzale et al.**

*Correspondence to:* Maria Provenzale ([maria.provenzale@helsinki.fi](mailto:maria.provenzale@helsinki.fi))

The copyright of individual parts of the supplement might differ from the CC BY 4.0 License.

## Contents of this file

1. Section S1: introduction
2. Section S2: calculation of the eddy covariance CO<sub>2</sub> flux
3. Section S3: Smith (1936) and Jassby and Platt (1976) model equations
- 5 4. Figg. S1-S14
5. Table S1: Michaelis-Menten, Smith and Jassby and Platt model fit statistics

## S1 Introduction

- This supporting information provides details on how the flux between Lake Kuivajärvi and the atmosphere, measured by eddy covariance, was calculated (Sect. S2). It also provides additional figures (Figg. S1-S14). Figures S1 and S2 consist of maps, showing the location of Lake Kuivajärvi in Finland, its bathymetry and the position of the measuring raft. Figure S3 is a schematic representation of the measuring system we built for the CO<sub>2</sub> concentration in the water. Figure S4 displays the time series of isotherms of the lake for the whole summers, while Figg. S5-S14 display the time series of isotherms, of the Schmidt stability and of the CO<sub>2</sub> concentration at 0.2 m for the periods of stable stratification chosen for analysis.

## S2 Calculation of the eddy covariance fluxes

- The CO<sub>2</sub> flux between the lake and the atmosphere was measured using the eddy covariance (EC) technique (Aubinet *et al.*, 2012). The fluxes were calculated as in Vesala *et al.* (2006); Mammarella *et al.* (2009, 2015). The chosen averaging time was 30 minutes, and the mean values were obtained by block-averaging. Before calculating the covariances, the data were despiked according to standard methods (Vickers and Mahrt, 1997). Successively, the coordinate system was rotated via a two-step rotation (Kaimal and Finnigan, 1994), so that the  $x$  axis was parallel to the mean wind direction and the mean of the vertical wind velocity was 0. The CO<sub>2</sub> mole fraction values were converted to dry mole fraction values (Burba *et al.*, 2012). The time lag between the measurement of the vertical wind velocity and the measurement of the CO<sub>2</sub> mole fraction was determined for each 30-min interval separately, by maximizing the difference between their cross-correlation function and the line connecting the values of the cross-correlation at the lag window boundaries (Clement, 2004). The fluxes were also corrected for high-frequency and low-frequency losses, according to Foken *et al.* (2012).
- Finally, the fluxes were quality screened. Data from 30-min intervals when the prevailing wind direction was not along the lake were discarded. Furthermore, data were also discarded when the absolute value of skewness of the CO<sub>2</sub> concentration or of the vertical wind velocity was  $> 2$  and the kurtosis was  $< 1$  or  $> 8$  (Vickers and Mahrt, 1997). The flux steady-state test (FST) was also applied (Foken and Wichura, 1996), and data were rejected when  $FST > 0.3$ . The CO<sub>2</sub> storage flux in the air between the water surface and the height of the measuring system (1.5 m) is negligible.

## 30 S3 Smith and Jassby and Platt model equations and fit results

We checked whether the Smith (1936) or the Jassby and Platt (1976) models were a better fit to the data than the Michaelis-Menten curve. Maintaining the assumption that the daytime respiration rate equals the nighttime respiration rate and that they depend exponentially on temperature (Carignan *et al.*, 2000), we still had:

$$NPP = GPP - R_h = GPP - r_0 Q_{10}^{T/10}, \quad (S1)$$

- with  $T$  as the water temperature (in °C),  $Q_{10}$  as a non-dimensional temperature coefficient with a value of 2 for freshwater communities, and  $r_0$  as the parameter representing the basal respiration of phytoplankton ( $\mu\text{mol}(\text{CO}_2)\text{m}^{-2}\text{s}^{-1}$ ).  $GPP$  was

expressed as

$$GPP = \frac{p_{\max} \alpha PAR}{\sqrt{p_{\max}^2 + \alpha^2 PAR^2}} \quad (S2)$$

following Smith (1936), and as

$$GPP = p_{\max} \tanh \frac{\alpha PAR}{p_{\max}} \quad (S3)$$

- 5 following Jassby and Platt (1976), with  $p_{\max}$  as the maximum potential photosynthetic rate ( $\mu\text{mol}(\text{CO}_2) \text{m}^{-2} \text{s}^{-1}$ ) and  $\alpha$  as the curve slope at low light levels ( $\mu\text{mol}(\text{CO}_2) \text{m}^{-2} \text{s}^{-1} (\mu\text{mol}(\text{ph}) \text{m}^{-2} \text{s}^{-1})^{-1}$ ).

The fit statics are reported in Table S1 (the Michaelis-Menten fit statistics are also reported, for comparison). They show that there is a good agreement between all the models and the data, and that there is no significant reason to discard the Michaelis-Menten curve.

## References

- Aubinet, M., Vesala, T., and Papale, D.: Eddy Covariance: A Practical Guide to Measurement and Data Analysis, Springer, Dordrecht, the Netherlands, 2012.
- Burba, G., et al.: Calculating CO<sub>2</sub> and H<sub>2</sub>O eddy covariance fluxes from an enclosed gas analyzer using an instantaneous mixing ratio, *Global Change Biol.*, 18, 385-399, 2012.
- 5 Carignan, R., Planas, D., Vis, C.: Planktonic production and respiration in oligotrophic Shield lakes, *Limnol. Oceanogr.*, 45, 189-199, 2000.
- Clement, R.: Mass and energy exchange of a plantation forest in Scotland using micrometeorological methods, Ph.D. thesis, Univ. of Edinburgh, Edinburgh, UK, 2004.
- Foken, T., and Wichura, B.: Tools for quality assessment of surface-based flux measurements, *Agric. For. Meteorol.*, 78, 83-105, 1996.
- 10 Foken, T., Aubinet, M., and Leuning, R.: The eddy covariance method, pp 1-19, In Aubinet, M., and others [eds.], *Eddy Covariance: A Practical Guide to Measurement and Data Analysis*, Springer, Dordrecht, the Netherlands, 2012.
- Jassby, A. D., and Platt, T.: Mathematical formulation of the relationship between photosynthesis and light for phytoplankton, *Limnol. Oceanogr.*, 21, 540-547, 1976.
- Kaimal, J. C., and Finnigan, J. J.: *Atmospheric Boundary Layer Flows, Their Structure and Measurements*, Oxford Univ. Press, New York,
- 15 1994.
- Mammarella, I., Launiainen, S., Grönholm, T., Keronen, P., Pumpanen, J., Rannik, Ü., and Vesala, T.: Relative humidity effect on the high-frequency attenuation of water vapor flux measured by a closed-path eddy covariance system, *J. Atmos. Ocean. Technol.*, 26, 1856-1866, 2009.
- Mammarella, I., Nordbo, A., Rannik, Ü, and others: Carbon dioxide and energy fluxes over a small boreal lake in Southern Finland, *J. Geophys. Res. Biogeosci.*, 120, 1296-1314, 2015.
- 20 Smith, E. L.: Photosynthesis in relation to light and carbon dioxide, *Proceedings of the National Academy of Sciences*, 22, 504-511, 1936.
- Vesala, T., Huotari, J., Rannik, Ü., Suni, T., Smolander, S., Sogachev, A., Launiainen, S., and Ojala, A.: Eddy covariance measurements of carbon exchange and latent and sensible heat fluxes over a boreal lake for a full open-water period, *J. Geophys. Res.*, 111, D11101, 2006.
- Vickers, D., and Mahrt, L.: Quality control and flux sampling problems for tower and aircraft data, *J. Atmos. Oceanic Technol.*, 14, 512-526,
- 25 1997.

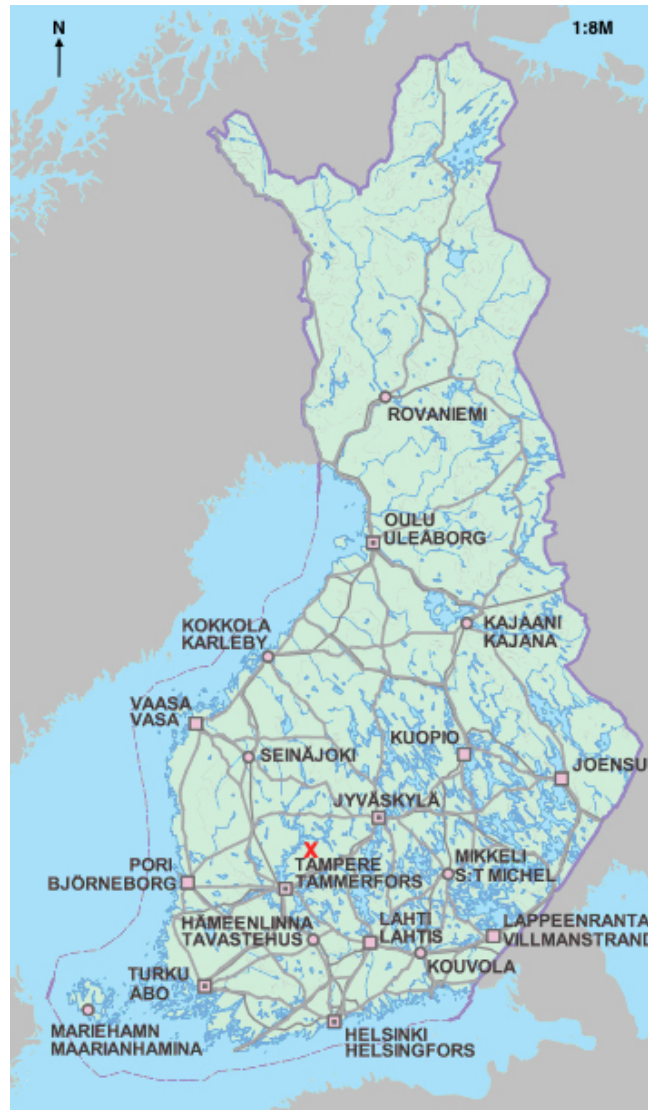

**Figure S1.** The location of Lake Kuivajärvi in Finland, represented by the red “x”. Its coordinates are 61°50.743’ N, 24°17.134’ E. This figure contains data from the National Land Survey of Finland Topographic Database 12/2015.

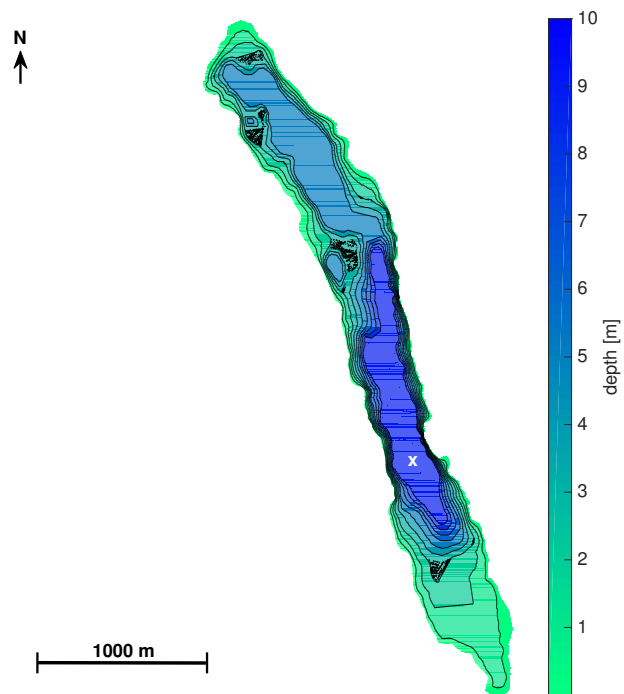

**Figure S2.** The bathymetry of Lake Kuivajärvi. The position of the raft with the measuring instruments is marked in the picture with a white “x”.

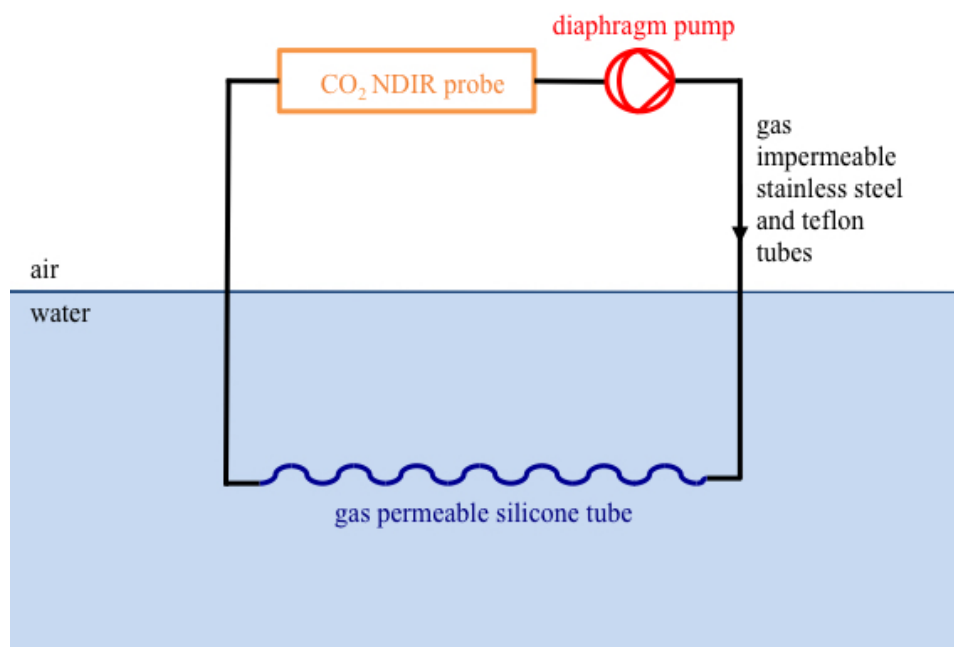

**Figure S3.** The measuring system, consisting in the CO<sub>2</sub> NDIR probe (CARBOCAP<sup>®</sup> GMP343, Vaisala Oyj, Vantaa, Finland) for the CO<sub>2</sub> concentration in the air, gas impermeable stainless steel and teflon tubes, a submerged silicone gas permeable tube (Rotilabo 9572.1, Carl Roth GmbH and Co. KG, Karlsruhe, Germany) and a diaphragm pump to circulate the air in the system (KNF Neuberger Micro gas pump, KNF Neuberger AB, Stockholm, Sweden).

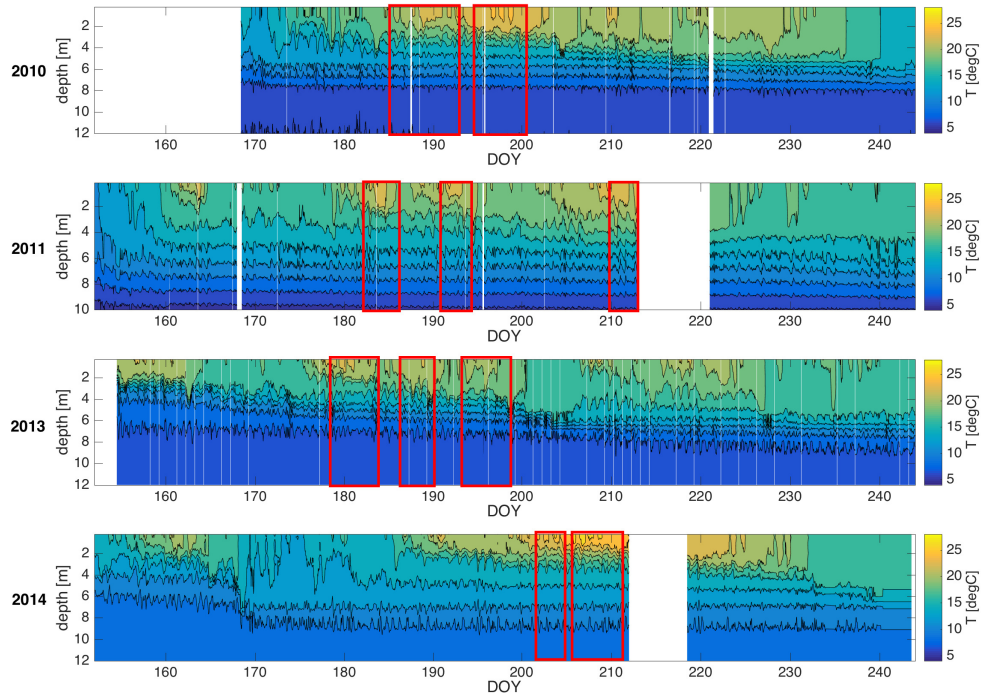

**Figure S4.** The temperature maps of the lake for the studied summers, from 1 June (DOY = 152) to 31 August (DOY = 243). The red rectangles indicate the periods of stable stratification that were chosen for the data analysis. All of them are between mid-June and the end of July.



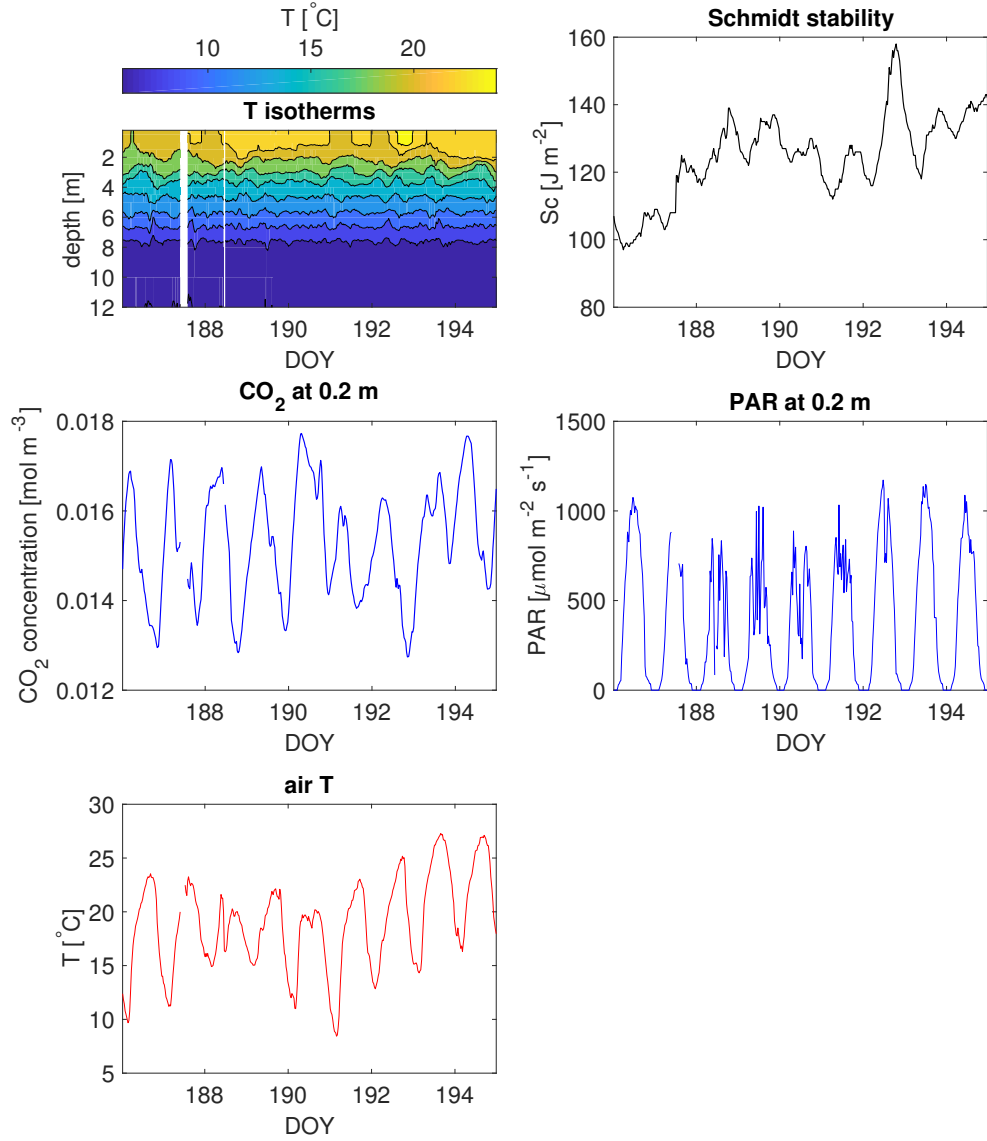

**Figure S5.** Time series of isotherms, Schmidt stability, CO<sub>2</sub> concentration and  $PAR$  at 0.2 m, and air temperature for the first period of stable stratification studied in 2010 (5 July - 13 July).

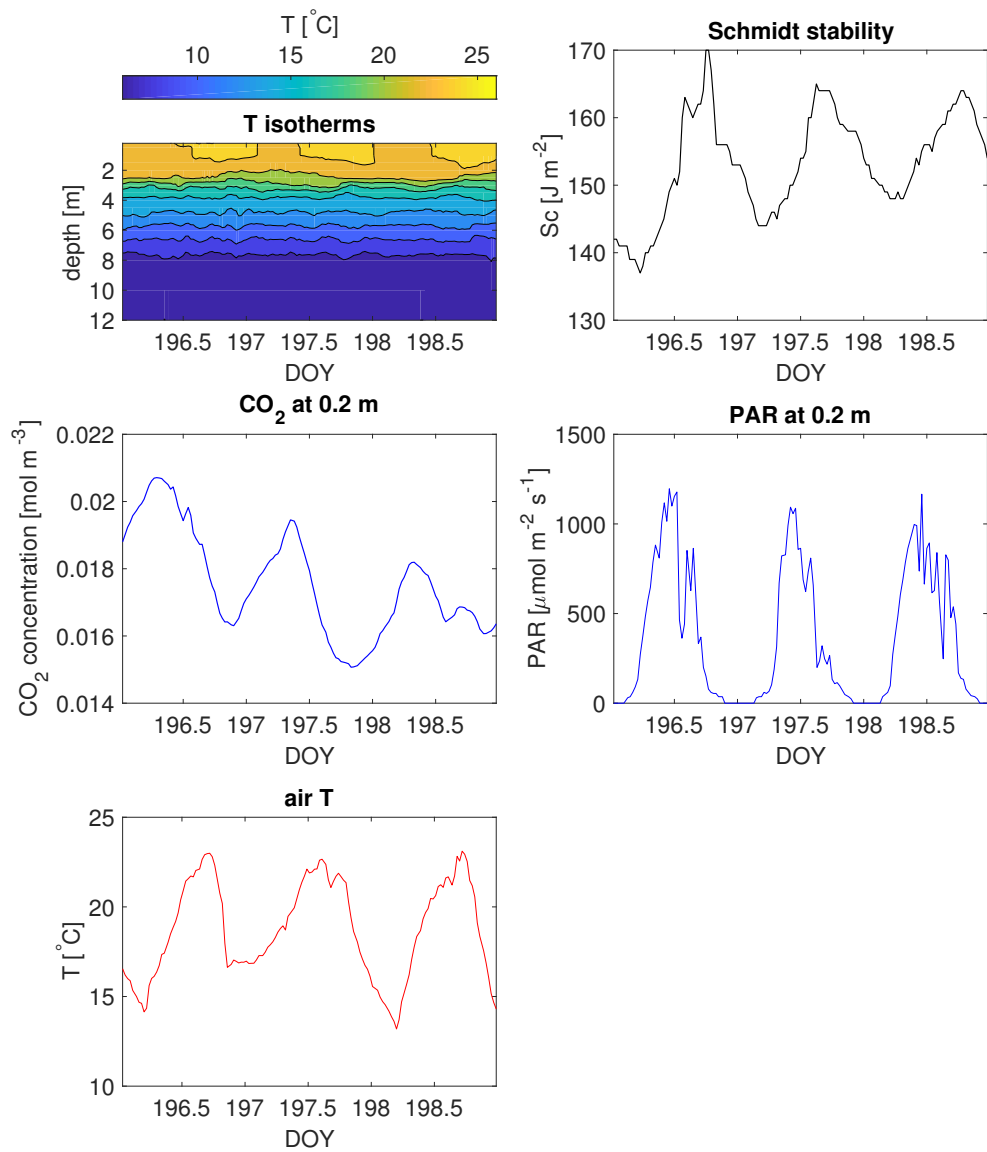

**Figure S6.** Time series of isotherms, Schmidt stability,  $\text{CO}_2$  concentration and  $PAR$  at 0.2 m, and air temperature for the second period of stable stratification studied in 2010 (15 July - 17 July).

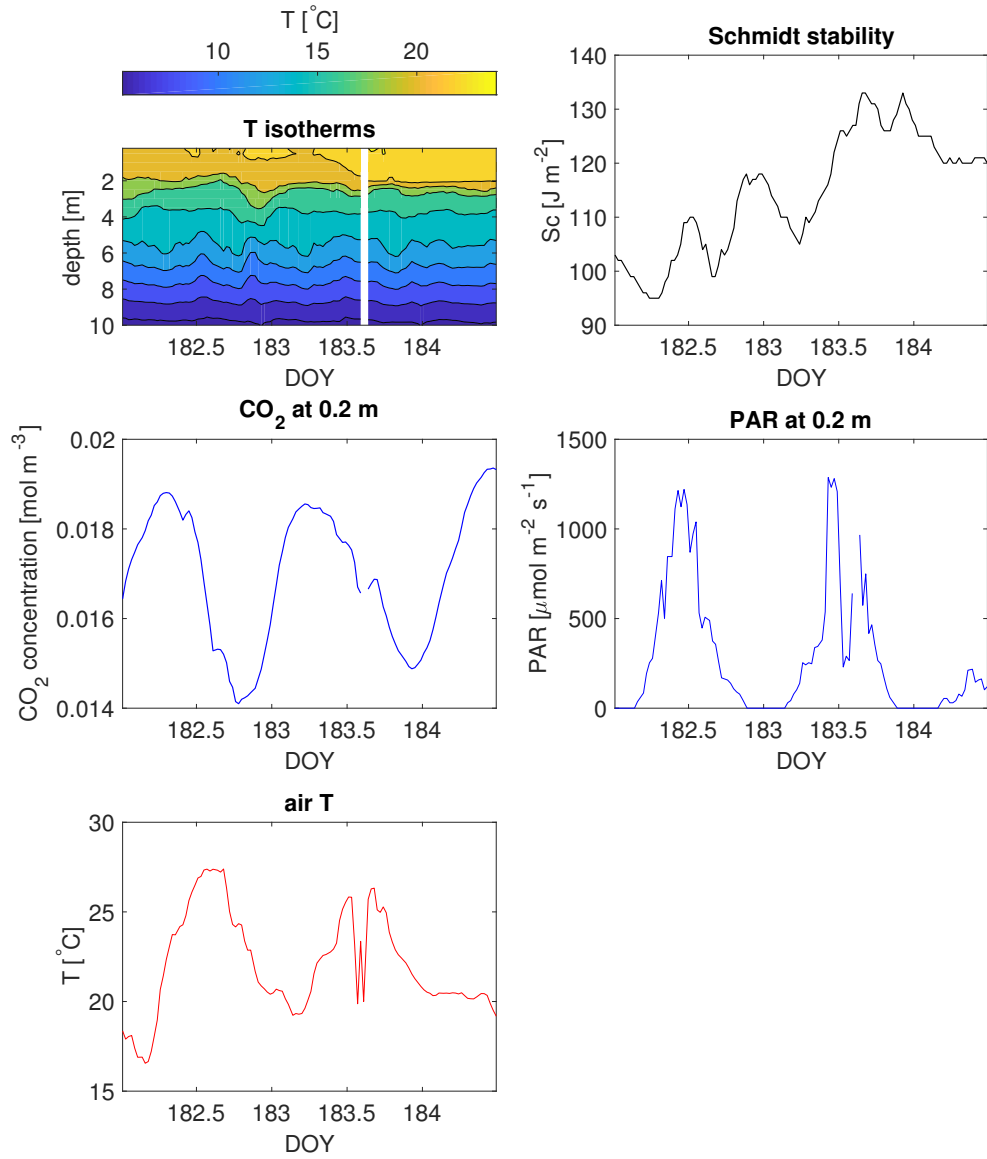

**Figure S7.** Time series of isotherms, Schmidt stability,  $\text{CO}_2$  concentration and  $PAR$  at 0.2 m, and air temperature for the first period of stable stratification studied in 2011 (1 July - 3 July).

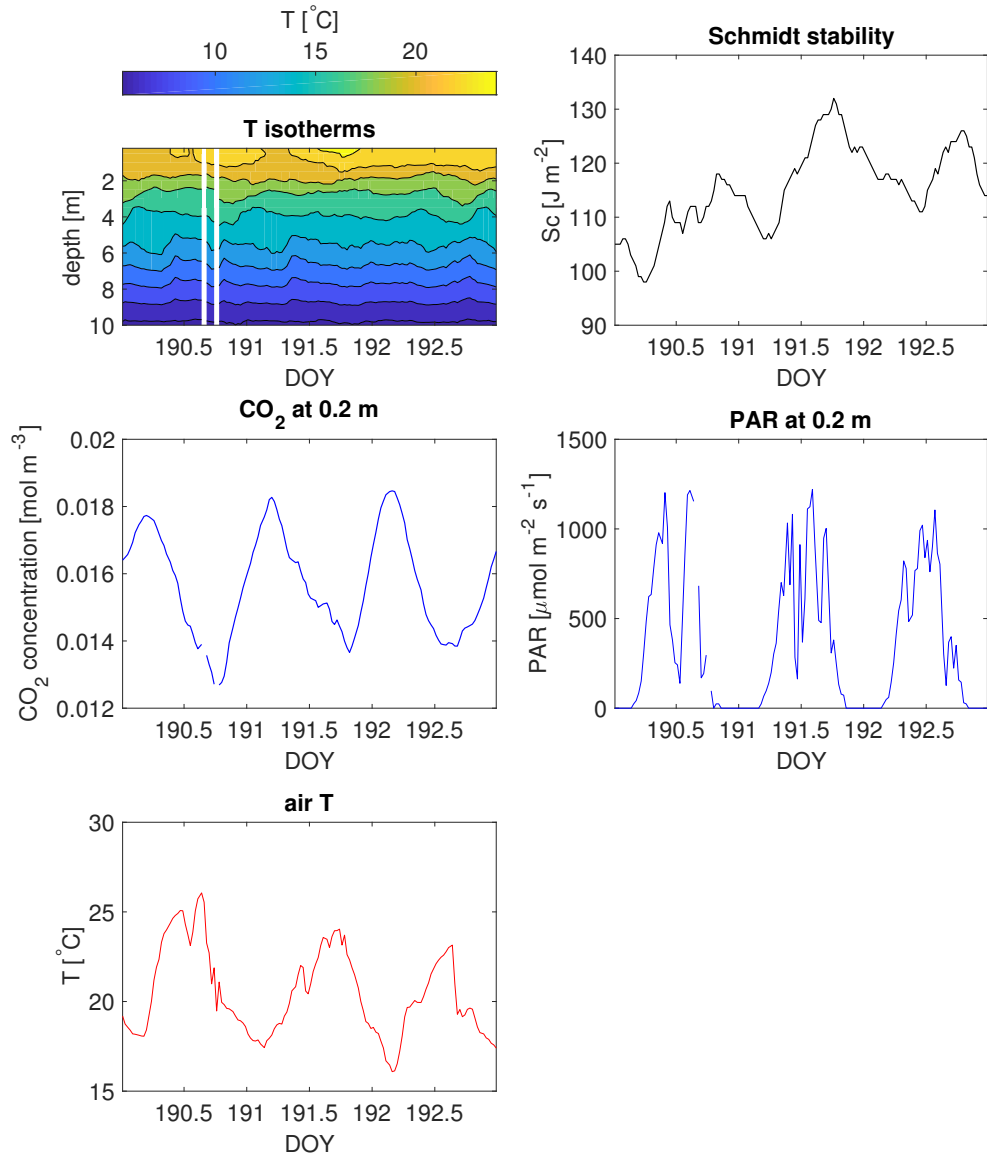

**Figure S8.** Time series of isotherms, Schmidt stability,  $\text{CO}_2$  concentration and  $PAR$  at 0.2 m, and air temperature for the second period of stable stratification studied in 2011 (9 July - 11 July).

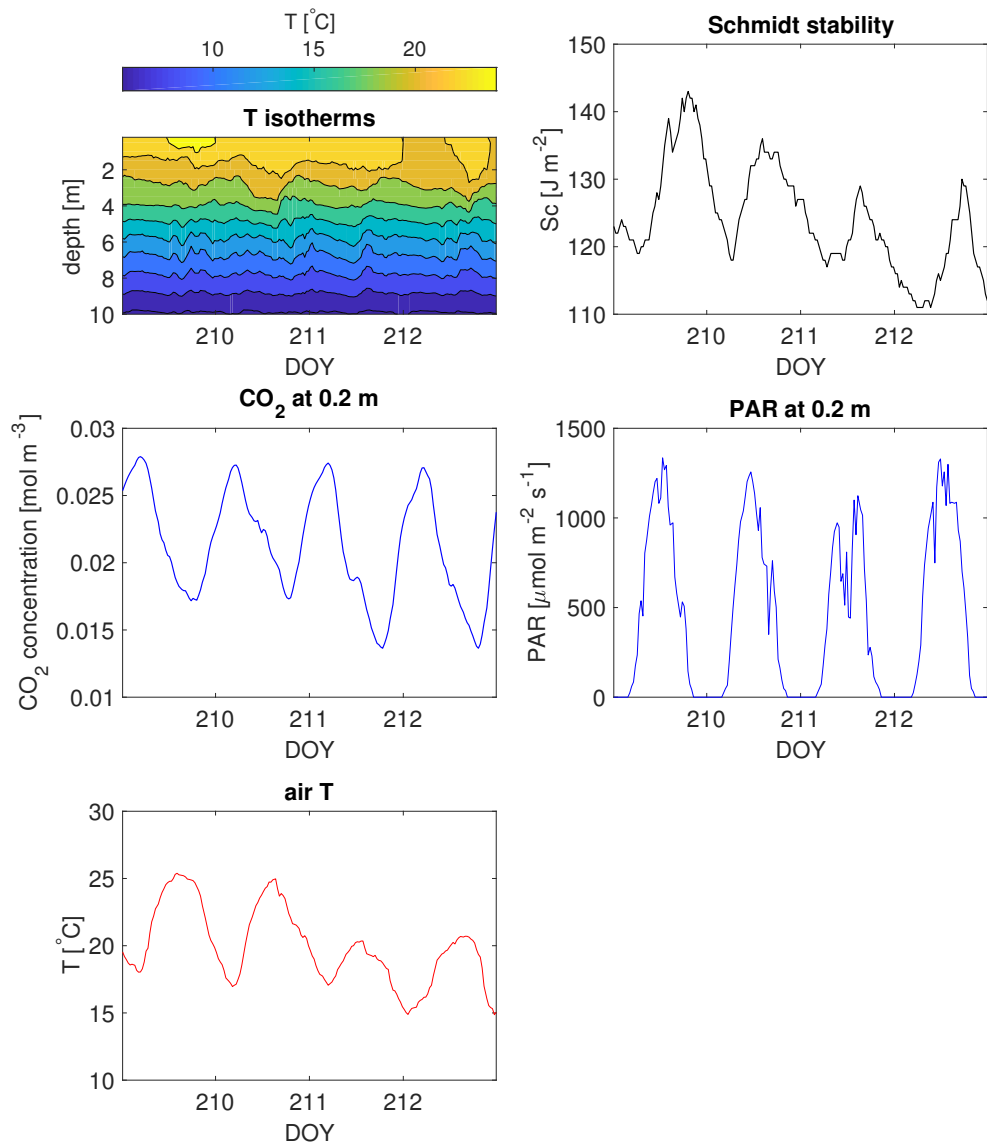

**Figure S9.** Time series of isotherms, Schmidt stability,  $\text{CO}_2$  concentration and  $PAR$  at 0.2 m, and air temperature for the third period of stable stratification studied in 2011 (28 July - 31 July).

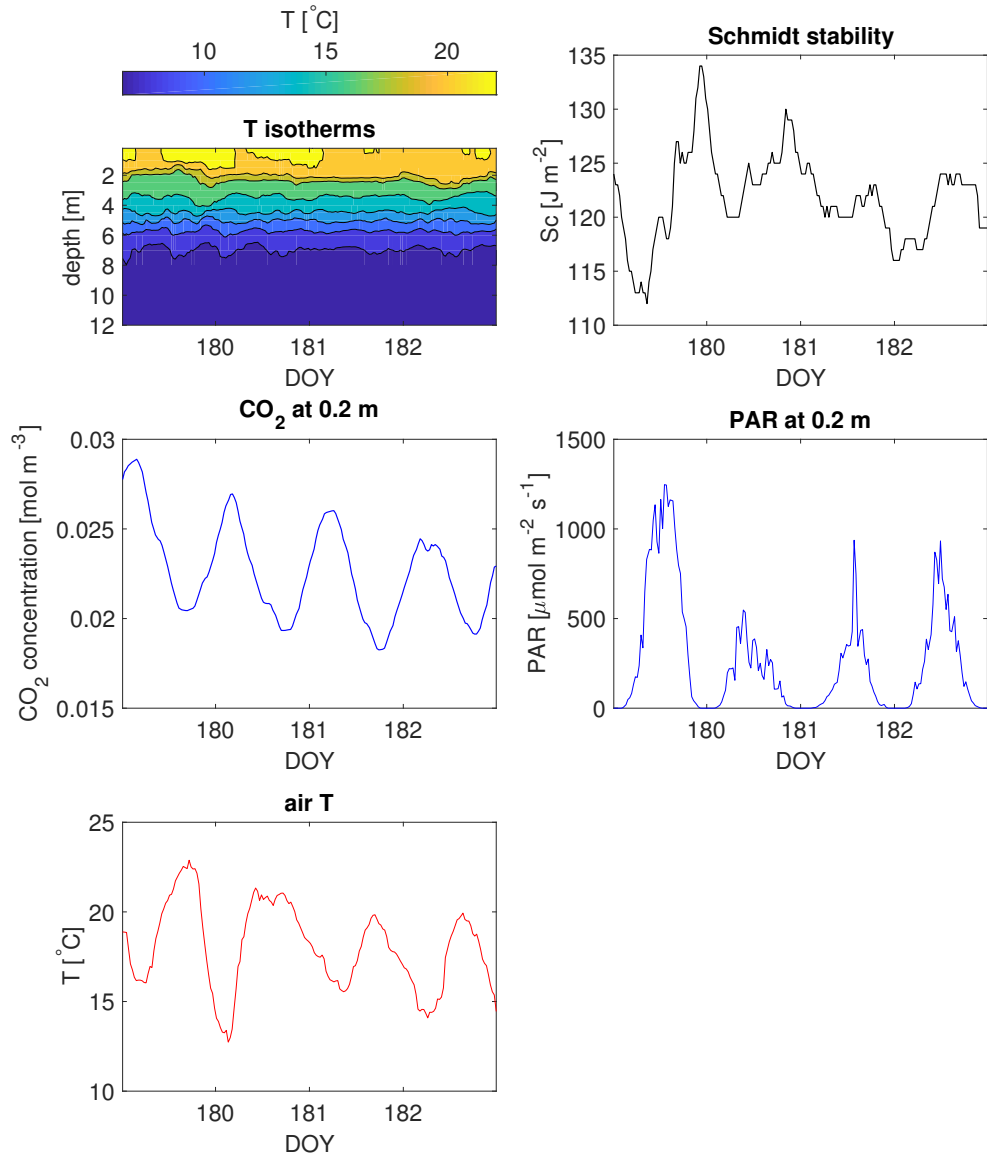

**Figure S10.** Time series of isotherms, Schmidt stability,  $\text{CO}_2$  concentration and  $PAR$  at 0.2 m, and air temperature for the first period of stable stratification studied in 2013 (28 June - 1 July).

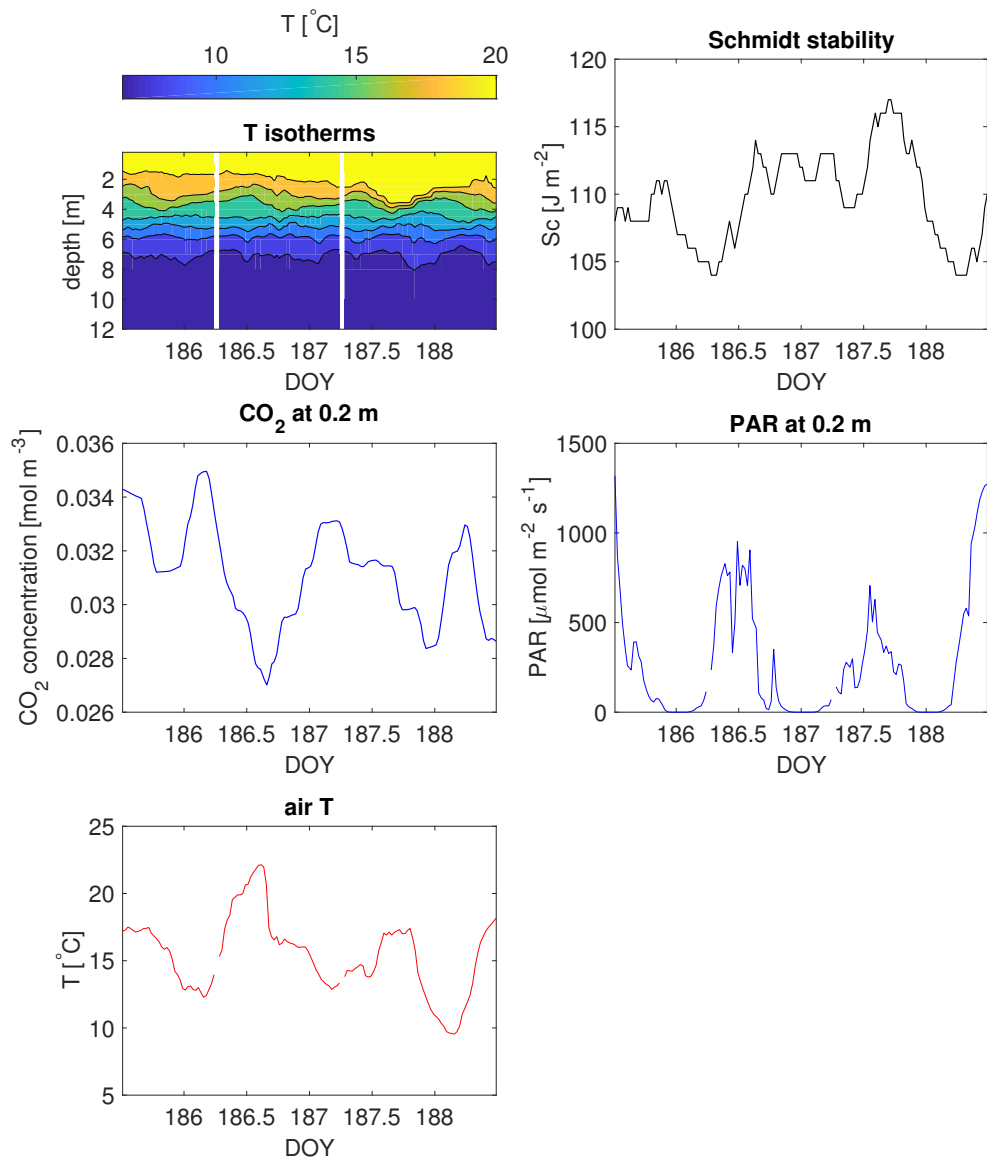

**Figure S11.** Time series of isotherms, Schmidt stability,  $\text{CO}_2$  concentration and  $PAR$  at 0.2 m, and air temperature for the second period of stable stratification studied in 2013 (4 July - 7 July).

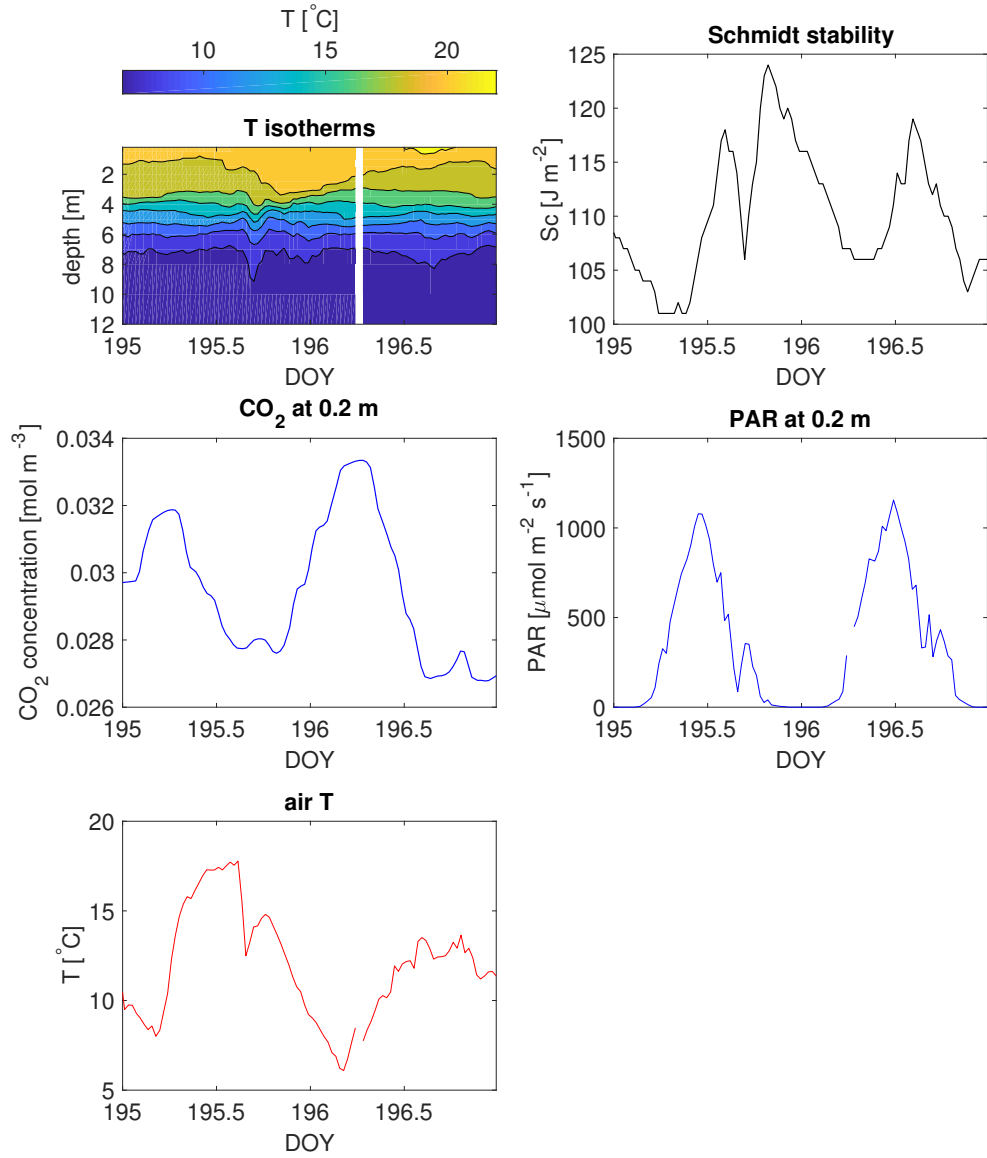

**Figure S12.** Time series of isotherms, Schmidt stability,  $\text{CO}_2$  concentration and  $PAR$  at 0.2 m, and air temperature for the third period of stable stratification studied in 2013 (14 July - 15 July).



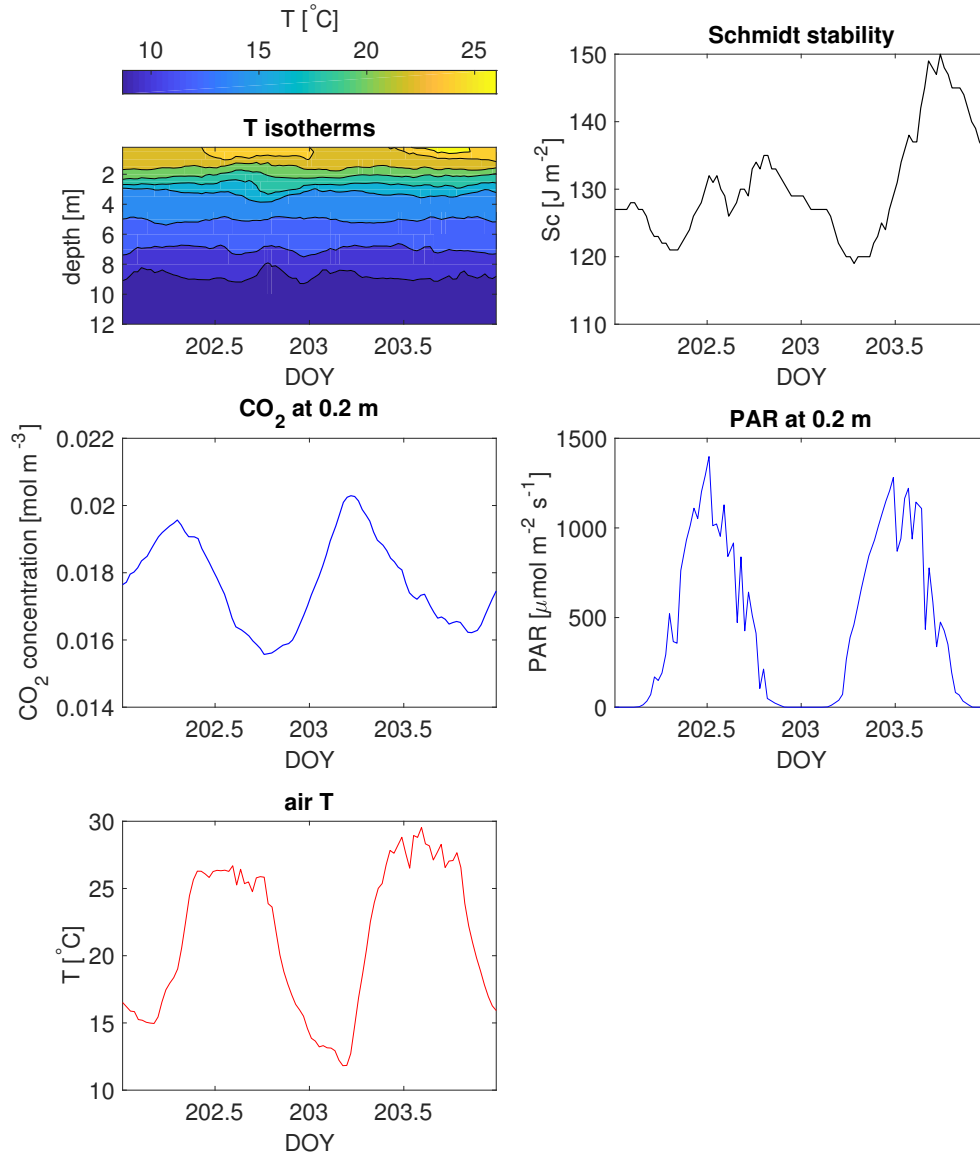

**Figure S13.** Time series of isotherms, Schmidt stability,  $\text{CO}_2$  concentration and  $PAR$  at 0.2 m, and air temperature for the first period of stable stratification studied in 2014 (21 July - 22 July).

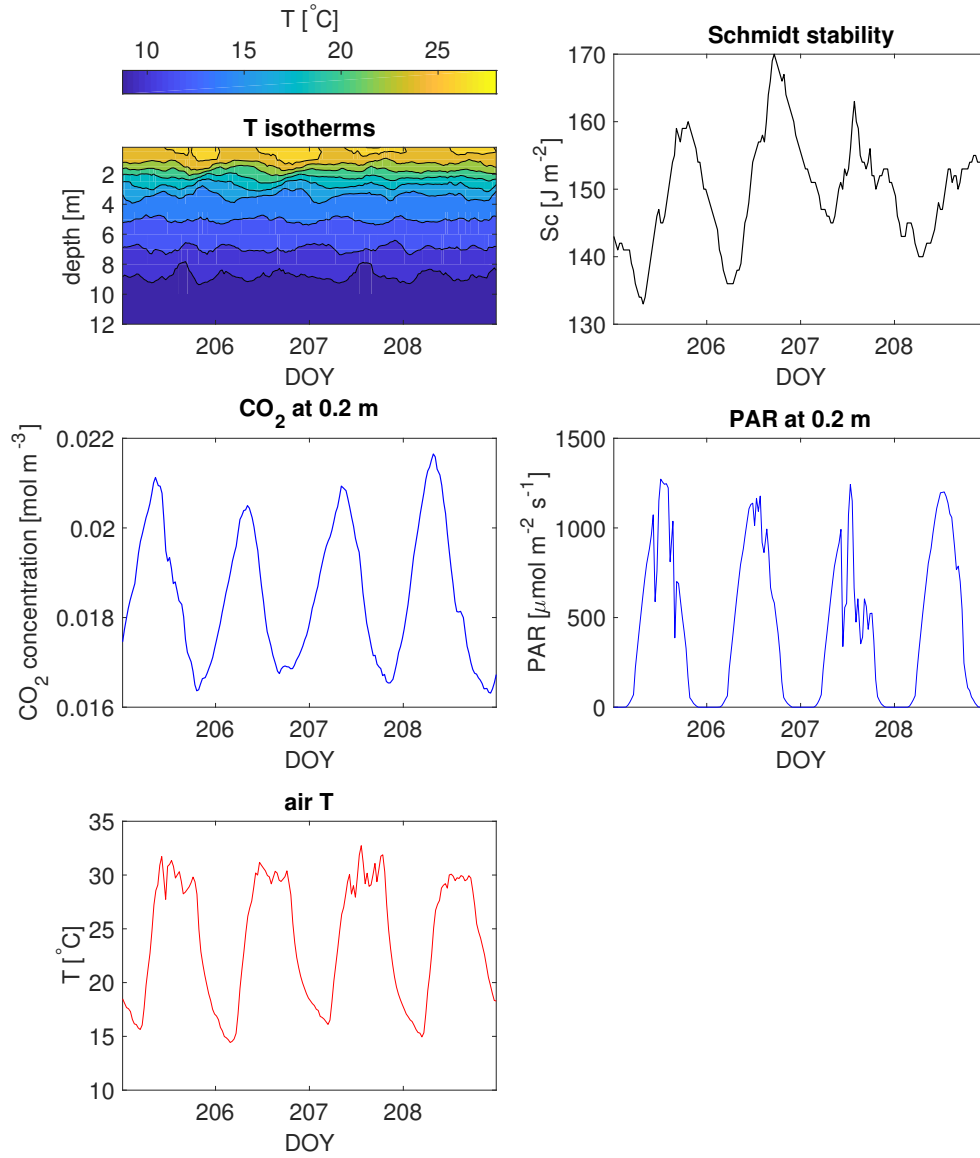

**Figure S14.** Time series of isotherms, Schmidt stability,  $\text{CO}_2$  concentration and  $PAR$  at 0.2 m, and air temperature for the second period of stable stratification studied in 2014 (24 July - 27 July).

**Table S1.** Fit statistics ( $R^2$  and RMSE in  $\mu\text{mol}(\text{CO}_2)\text{m}^{-2}\text{s}^{-1}$ ).

| Model            | 2010<br>$R^2$ | RMSE | 2011<br>$R^2$ | RMSE | 2013<br>$R^2$ | RMSE | 2014<br>$R^2$ | RMSE |
|------------------|---------------|------|---------------|------|---------------|------|---------------|------|
| Michaelis-Menten | 0.73          | 0.23 | 0.84          | 0.25 | 0.71          | 0.14 | 0.74          | 0.33 |
| Smith            | 0.76          | 0.22 | 0.85          | 0.25 | 0.70          | 0.15 | 0.74          | 0.33 |
| Jassby and Platt | 0.76          | 0.22 | 0.84          | 0.25 | 0.70          | 0.15 | 0.74          | 0.33 |
